# Supplementary material
Source: publisher site journal article supplement (https://oneecosystem.pensoft.net/article/download/suppl/8053149/)
Supplement: Supplementary file 1

id	InVEST spatial statistic specified
Elevation	raster_mean
Slope	raster_mean
Population	raster_mean
Habitat diversity	raster_mean
Agriculture	line_intersect_length
Forest and Natural Area	polygon_area_coverage
Wetlands	polygon_area_coverage
River length	polygon_area_coverage
Water cover	polygon_area_coverage
Coast distance	raster_mean
Town distance	point_nearest_distance
Path Length	line_intersect_length
Geology distance	point_nearest_distance
Recreation distance	point_nearest_distance
